# Supplementary material for: Development and Psychometric Properties of a New Patient-Reported Outcome Instrument of Health-Related Quality of Life Specific to Patients with Gambling Disorder: The Gambling Quality of Life Scale (GQoLS)
Source: MDPI journal article supplement (doi:10.3390/ijerph191710806), 2022-08-30
Supplement: s1 [file s1]

## **SUPPLEMENTARY MATERIAL**

**Table S1. Construct validity of the GQoLS with EQ-5D and PGSI (n = 98)**

|                                                 | <i>Mean (SD)</i> | <i>r</i> |
|-------------------------------------------------|------------------|----------|
| Mobility (n= 97)                                | 1.06 (0.24)      | -0.19    |
| Self-care (n= 97)                               | 1.02 (0.14)      | 0.06     |
| Activity (n= 97)                                | 1.27 (0.51)      | -0.01    |
| Pain (n= 97)                                    | 1.41 (0.60)      | -0.06    |
| Anxiety (n= 97)                                 | 2.08 (0.59)      | 0.26     |
| Health state visual analog scale (VAS) (n = 96) | 68.65 (20.50)    | -0.19    |
| PGSI                                            | 15.32 (5.00)     | 0.52     |

**Table S2. *Item-dimension***

***correlation Factor 1***

|                     |             |
|---------------------|-------------|
| <i>Item 14 (37)</i> | <i>0.65</i> |
| Item 15 (39)        | 0.61        |
| Item 16 (41)        | 0.73        |
| Item 17 (44)        | 0.73        |
| Item 18 (45)        | 0.68        |
| Item 19 (46)        | 0.65        |
| Item 20 (48)        | 0.52        |

***Factor 2***

|                   |             |
|-------------------|-------------|
| <i>Item 1 (2)</i> | <i>0.61</i> |
| Item 2 (4)        | 0.65        |
| Item 6 (10)       | 0.59        |
| Item 7 (11)       | 0.70        |
| Item 8 (16)       | 0.63        |

|             |      |
|-------------|------|
| Item 9 (19) | 0.71 |
|-------------|------|

*Factor 3*

|            |      |
|------------|------|
| Item 3 (6) | 0.50 |
| Item 4 (7) | 0.64 |
| Item 5 (8) | 0.49 |

*Factor 4*

|              |      |
|--------------|------|
| Item 10 (22) | 0.46 |
| Item 11 (27) | 0.61 |
| Item 21 (51) | 0.52 |

*Factor 5*

|              |      |
|--------------|------|
| Item 12 (31) | 0.59 |
| Item 13 (32) | 0.59 |

**Section S1 : Selection of items for GQoLS-BREF**

1/ Selection of the two items of each dimension permitting the best internal consistency:

dim\* 1: item 41 and item 44

dim 2: item 11 and item 19

dim 3: item 7 and item 8

dim 4: item 27 and item 51

dim 5: item 31 and item 32

2/ Selection of the two items of each dimension with the best load:

dim 1: item 41 and item 45

dim 2: item 11 and item 19

dim 3: item 7 and item 8

dim 4: item 27 and item 51

dim 5: item 31 and item 32

3/ Selection of the two items of each dimension with the best item-dimension correlations: \_

dim 1: item 41 and item 44

dim 2: item 11 and item 19

dim 3: item 6 and item 7

dim 4: item 27 and item 51

dim 5: item 31 and item 32

\*dim: dimension
